# Supplementary material for: Blood-Based Liquid Biopsy for Comprehensive Cancer Genomic Profiling Using Next-Generation Sequencing: An Emerging Paradigm for Non-invasive Cancer Detection and Management in Dogs
Source: PubMed Central journal article supplement (PMC8297996; doi:10.3389/fvets.2021.704835), 2021-07-08
Supplement: Table_1.pdf [file Table_1.pdf]

**SUPPLEMENTARY TABLE 1. Full subject-level genomic results.** Genomic profiling identified somatic alterations in tissue from all cancer positive subjects. Somatic alterations were detectable in the plasma in 7 of 11 cancer-positive subjects. No somatic alterations were detected in the plasma from healthy subjects.

| Subject Information |                                                                                               | Test Status |          | Test Results Detail   |                                  | Tumor Biopsy |   |   |   |   | Blood Sample |              |   |
|---------------------|-----------------------------------------------------------------------------------------------|-------------|----------|-----------------------|----------------------------------|--------------|---|---|---|---|--------------|--------------|---|
| Subject ID          | Primary Diagnosis                                                                             | Tumor       | Blood    | Detected Variant Type | Variant Detail (SNV Only)        | 1            | 2 | 3 | 4 | 5 | Pre Surgery  | Post Surgery |   |
| PT01                | Cystic Renal Carcinoma                                                                        | Positive    | Positive | SNV                   | PDGFRA (c.2140+28C>T)            | ●            | ● | ● | ○ | ● | N/A*         | ○            |   |
|                     |                                                                                               |             |          | SNV                   | ENSCAFG00000047557 (p.LEU117GLN) | ○            | ○ | ● | ○ | ● | N/A*         | ○            |   |
|                     |                                                                                               |             |          | CNV                   |                                  | ●            | ● | ● | ● | ● | ●            | ●            | ○ |
| PT02                | Cholangiocellular Carcinoma                                                                   | Positive    | Positive | SNV                   | PDGFRB (p.Leu583Pro)             | ●            | ○ | ○ | ○ | ● | ○            | ●            |   |
|                     |                                                                                               |             |          | SNV                   | EGFR (p.Leu805Arg)               | ○            | ○ | ● | ○ | ● | ○            | ●            |   |
|                     |                                                                                               |             |          | SNV                   | CTNNB1 (p.Lys335Ile)             | ○            | ○ | ○ | ○ | ● | ●            | ●            |   |
|                     |                                                                                               |             |          | CNV                   |                                  | ○            | ○ | ● | ● | ● | ●            | ●            | ● |
| PT03                | Metastatic Pancreatic Carcinoma; Hepatocellular Carcinoma; Metastatic Splenic Hemangiosarcoma | Positive    | Positive | SNV                   | NRAS (p.Gly13Arg)                | ○            | ○ | ● | ○ | ● | ●            | ○            |   |
|                     |                                                                                               |             |          | SNV                   | TP53 (p.Gly318Arg)               | ○            | ● | ○ | ○ | ○ | ●            | ○            |   |
|                     |                                                                                               |             |          | SNV                   | KRAS (p.Gly106Asp)               | ○            | ○ | ● | ○ | ○ | ○            | ○            |   |
|                     |                                                                                               |             |          | SNV                   | TP53 (p.Arg332Ile)               | ○            | ○ | ● | ● | ○ | ●            | ○            |   |
|                     |                                                                                               |             |          | SNV                   | PTPN11 (p.Gly507Val)             | ○            | ○ | ○ | ○ | ○ | ○            | ○            | ● |
|                     |                                                                                               |             |          | CNV                   |                                  | ●            | ● | ● | ○ | ● | ●            | ●            | ● |
| PT04                | Anal Sac Adenocarcinoma                                                                       | Positive    | Positive | CNV                   |                                  | ●            | ● | ● | ● | ● | ●            | ○            |   |
| PT05                | Bilateral Anal Sac Adenocarcinoma                                                             | Positive    | Negative | CNV                   |                                  | ●            | ● | ○ | ● | ● | ○            | ○            |   |
| PT06                | Multifocal Mast Cell Tumor                                                                    | Positive    | Negative | CNV                   |                                  | ●            | ● | ○ | ○ | ○ | ○            | ○            |   |
| PT07                | Anal Sac Adenocarcinoma                                                                       | Positive    | Negative | SNV                   | PIK3CA (p.Tyr1021Cys)            | ○            | ○ | ● | ○ | ○ | ○            | ○            |   |
|                     |                                                                                               |             |          | CNV                   |                                  | ●            | ○ | ○ | ○ | ○ | ○            | ○            | ○ |
| PT08                | Soft Tissue Sarcoma                                                                           | Positive    | Positive | CNV                   |                                  | ●            | ○ | ○ | ○ | ○ | ●            | ○            |   |
| PT09                | Multifocal Soft Tissue Sarcoma                                                                | Positive    | Negative | CNV                   |                                  | ●            | ● | ● | ● | ● | ○            | ○            |   |
| PT10                | Osteosarcoma                                                                                  | N/A         | Positive | SNV                   | CALR (c.1054-37G>A)              | ○            | ○ | ○ | ○ | ○ | ●            | ○            |   |
|                     |                                                                                               |             |          | SNV                   | TP53 (p.Glu71SerfsTer7)          | ○            | ○ | ○ | ○ | ○ | ○            | ○            | ○ |
|                     |                                                                                               |             |          | CNV                   |                                  | ○            | ○ | ○ | ○ | ○ | ○            | ○            | ○ |
|                     |                                                                                               |             |          | Fragment Length       |                                  | ○            | ○ | ○ | ○ | ○ | ○            | ○            | ○ |
| PT11                | Hemangiosarcoma (renal, splenic)                                                              | N/A         | Positive | SNV                   | PIK3CA (p.Asn347Lys)             | ○            | ○ | ○ | ○ | ○ | ○            | ○            |   |
|                     |                                                                                               |             |          | Fragment Length       |                                  | ○            | ○ | ○ | ○ | ○ | ○            | ○            | ○ |
| PT12**              | Presumed cancer-free                                                                          | N/A         | Negative | None                  |                                  | ○            | ○ | ○ | ○ | ○ | ○            | ○            |   |
| PT13**              | Presumed cancer-free                                                                          | N/A         | Negative | None                  |                                  | ○            | ○ | ○ | ○ | ○ | ○            | ○            |   |
| PT14**              | Presumed cancer-free                                                                          | N/A         | Negative | None                  |                                  | ○            | ○ | ○ | ○ | ○ | ○            | ○            |   |
| PT15**              | Presumed cancer-free                                                                          | N/A         | Negative | None                  |                                  | ○            | ○ | ○ | ○ | ○ | ○            | ○            |   |
| PT16**              | Presumed cancer-free                                                                          | N/A         | Negative | None                  |                                  | ○            | ○ | ○ | ○ | ○ | ○            | ○            |   |

\*The baseline blood sample for PT01 failed minimum coverage requirements.

\*\*Subjects PT12-PT16 were presumed to be cancer-free due to no history of cancer and no clinical signs consistent with cancer at the time of blood collection.

**CNV = Copy Number Variant; SNV = Single Nucleotide Variant; NA = Not Applicable**

**LEGEND**

- Variant detected
- Sample at given timepoint not available
- No variant detected
